# Supplementary material
Source: publisher figshare collection journal article supplement (https://gsapubs.figshare.com/ndownloader/files/23300108)
Supplement: Supplementary file 1 [file 23300108]

Salt-marsh foraminiferal record of ten large Holocene (last 7500 yrs) earthquakes on a subducting plate margin, Hawkes Bay, New Zealand

Bruce W Hayward, Hugh R. Grenfell, Ashwaq T. Sabaa, Kate J. Clark, Ursula A. Cochran, Laura Wallace and Alan S. Palmer

Supplementary File 2. Site data for Holocene cores from Ahuriri Inlet, Hawkes Bay, New Zealand.

FRF = New Zealand Fossil Record Number (prefix V21 unless stated). AU = catalogue number in University of Auckland collections. Grid ref = map reference on NZ Map Series 260.

Core FRF Year AU number Easting Northing Elev Grid Ref Length Total Core

V21/ cored above cored depth type

MSL

##### Northern

A6 V40/f411 1999 17821 1.0 m V20/415904 3.0 m vibracore

###### Central

A2 f422 1999 17818 0.8 m V21/411863 6.0 m vibracore

###### Poraiti Corner

A4 f420 1999 17819 ~1.0 m V21/408841 1.1 m vibracore

A5 f421 1999 17820 0.2 m V21/408840 6.8 m vibracore

A7 f431 2003 17822 0.3 m V21/408840 21 m hydr. piston, rotary

A10 f434 2003 17825 1930804.226 5622452.747 0.71 m V21/407840 3 m vibracore

Poraiti Lane

A11 f437 2003 17828 ~0.6 m V21/408830 11.3 m vibracore, hydraulic

piston & rotary

A12 f438 2003 17829 ~0.5 m V21/411828 12 m hydr. piston, rotary

A13 f439 2003 17830 1930922.724 5621374.085 0.48 m V21/410830 7.3 m 0.9 m diam augur

A14 f440 2003 17831 1930885.278 5621374.330 0.51 m V21/409830 3.2 m 0.9 m diam auger

A15 f441 2005 1931016.974 5621276.137 0.27 m V21/411828 4.6 m vibracore

A16 f442 2005 1930874.183 5621299.688 0.35 m V21/409828 4.3 m vibracore

A17 f564 2012 21025 0.15 m BK39/410289 294 cm 431 cm vibracore

A18 f565 2012 21415 ~0.35 m BJ39/408829 450 cm gauge core

A19 f566 2013 21416 ~0.5 m BJ39/409829 360 cm 470 cm vibracore

A20 f567 2013 21417 ~0.5 m BJ39/412829 450 cm gauge core

PL1 f585 2011 21075 ~0.8 m 350 cm gauge core

PL2 f586 2011 21076 ~0.8 m 350 cm gauge core

PL3 2012 1930821.887 5621374.415 0.55 m 250 cm gauge core

PL4 f587 2012 21030 1930823.226 5621384.338 0.78 m 184 cm 244 cm vibrocore

PL5 2012 1930965.109 5621277.841 0.15 m

PL7 2012 ~0.4 m BJ39/409829 395 cm gauge core

PL8 f588 2013 ~0.65 m BJ39/407827 450 m gauge core

Poraiti Hull paddock

PH1 f597 2011 21070 1930822.710 5621451.075 1.13 m 350 cm gauge core

PH2 f598 2011 21071 1930758.198 5621371.546 1.19 m 200 cm gauge core

PH3 f599 2011 21072 1930789.914 5621355.244 1.09 m 300 cm gauge core

PH4 f600 2011 21073 1930777.380 5621351.476 1.14 m 300 cm gauge core

PH5 f601 2011 21074 1930787.068 5621344.993 0.92 m 220 cm gauge core

PH5A f602 2012 1930787.068 5621344.993 0.92 m 80 cm 50cm gauge core

Poraiti Road end

PR1 2011 1930150.281 5622534.141 1.6 m 350 cm 430 cm gauge core

PR2 2011 21055 1930145.075 5622525.994 1.6 m 350 cm 420 cm gauge core

PR3 f589 2011 21056 1930051.076 5622522.646 1.2 m 350 cm gauge core

PR3B f590 2012 21024 1930054.505 5622520.609 1.35 m 262 cm 320 cm vibrocore

PR4 f591 2011 21057 1930030.212 5622500.205 1.41 m 350 cm gauge core

PR5 f592 2012 21022 1.7 m V21/402842 350 cm 450 cm gauge core

PR6 f593 2012 21023 ~1.1 m V21/402842 350 cm gauge core

PR7 f594 2013 21418 ~1.6 m BJ39/402842 490 cm 570 cm vibracore

PR9 f595 2013 21419 ~1.0 m BJ39/402842 100 cm gauge core

PR11 f596 2013 21420 ~1.8 m BJ39/402842 450 cm gauge core

Ohingaora Bay

Oh1 f568 2011 21058 3.21 m V21/393847 350 cm 400 cm gauge core

Oh2 f569 2011 21059 2.93 m V21/394847 350 cm gauge core

Oh3 f570 2011 21060 1.88 m V21/396849 350 cm gauge core

Oh4 f571 2011 21061 ~2.1 m V21/395848 350 cm gauge core

Oh5 f603 2011 21062 ~2.4 m V21/395847 350 cm gauge core

Oh6 f572 2011 21063 ~2.7 m V21/394847 350 cm gauge core

Oh7 f573 2011 21064 ~3.2 m V21/393847 350 cm gauge core

Oh8 2012 1929405.402 5623086.518 3.67 m 350 cm gauge core

Oh9 2012 1929403.540 5623100.352 3.71 m 350 cm gauge core

Oh10 2012 1929400.053 5623112.138 3.65 m 250 cm gauge core

Oh11 f574 2012 21029 1929383.1 5623104.637 3.88 m BJ39/395850 250 cm gauge core

Oh12 2012 1929389.795 5623114.145 3.21 m 130 cm gauge core

Oh13 2012 1929491.461 5623225.176 2.93 m 350 cm gauge core

Oh14 f575 2012 21026 1929488.942 5623320.856 2.59 m BJ39/395850 340 cm 400 cm vibracore

Oh15 2012 1929559.073 5623453.328 1.99 m 350 cm gauge core

Oh16 2012 1929521.844 5623431.625 1.98 m 280 cm gauge core

Oh17 2012 1929659.714 5623371.121 1.88 m gauge core

Oh18 f576 2012 21020 ~3.3 m V21/394847 185 cm gauge core

Oh19 f577 2013 21421 ~1.9 m BJ39/396851 450 cm gauge core

Oh20 f578 2013 21422 ~2.4 m BJ39/397850 450 cm gauge core

Oh21 f579 2013 21423 ~3.9 m BJ39/395847 450 cm gauge core

Oh22 f580 2013 21424 ~4.1 m BJ39/394848 450 cm gauge core

Oh23 f581 2013 21425 ~3.4 m BJ39/394848 450 cm gauge core

Oh24 f582 2013 21426 ~2.9 m BJ39/394849 450 cm gauge core

Oh25 f583 2013 21427 ~4.3 m BJ39/394848 430 cm gauge core
